# Supplementary material
Source: HighWire-hosted journal article supplement (https://jnm.snmjournals.org/highwire/filestream/103401/field_highwire_adjunct_files/0/258673_Supplemental_Data.pdf)
Supplement: 258673_Supplemental_Data.pdf [file 258673_Supplemental_Data.pdf]

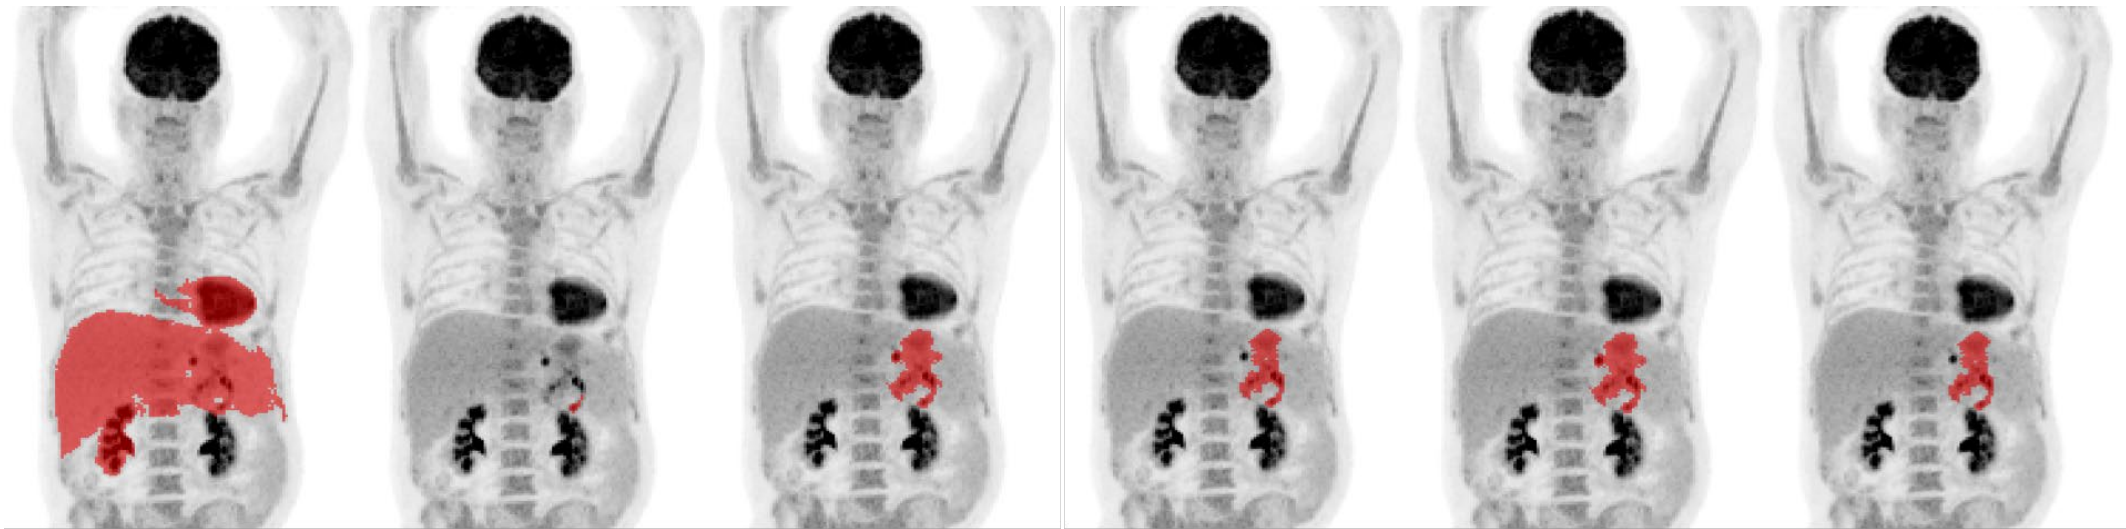

SUV 2.5 (3427 ml)

SUV 4.0 (2.13 ml)

41%max (143 ml)

A50%peak (96 ml)

MV2 (143 ml)

MV3 (96 ml)

“failed”

“poor”

“good”

“moderate”

“good”

“moderate”

Supplemental FIGURE 1. Example scores per method derived MTV in a casus of DLBCL located in stomach, DS5. Scores “good” and “moderate” were considered as acceptable delineations whereas “poor” and “failed” were not.

**\*A**

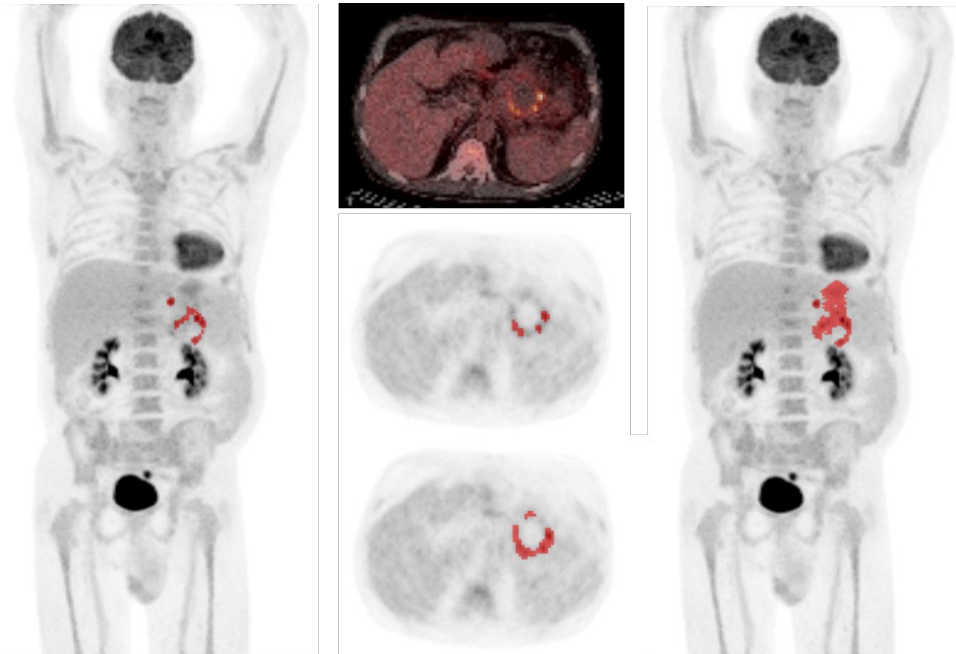

MTV MV3  
12 ml (middle)

MTV SUV 4.0  
98 ml (lowest)

**\*B**

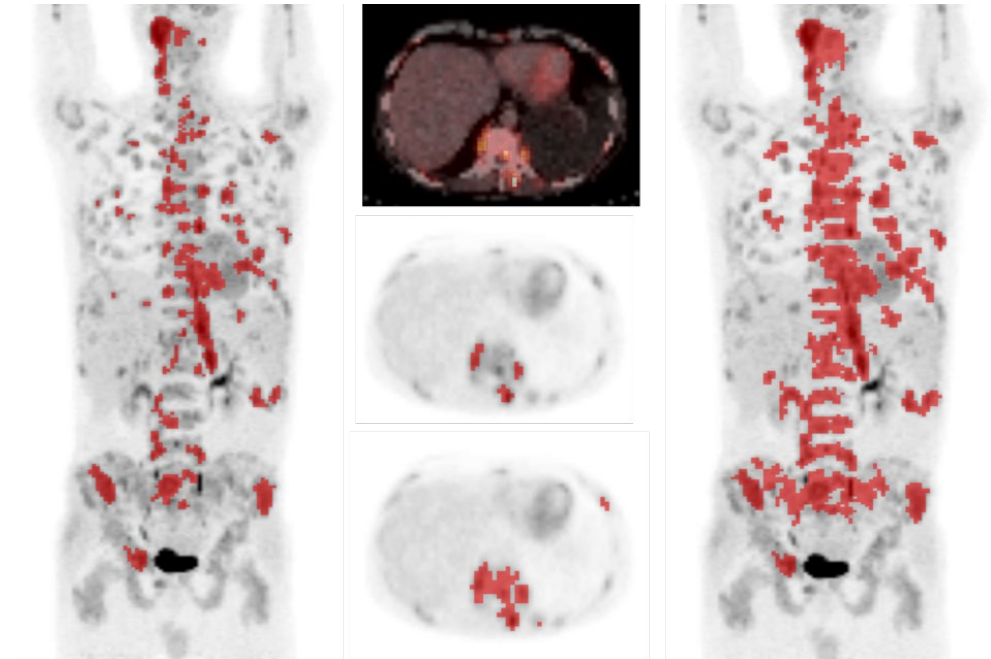

MTV MV3  
245 ml (middle)

MTV SUV 4.0  
756 ml (lowest)

Supplemental FIGURE 2. The delineation quality of MV3 derived MTVs \*A and \*B were rated as “non-acceptable” and were considered as providing underestimation of tumor volume by all observers. All observers scored SUV4.0 delineated MTV \*A as “acceptable” while one observer scored MTV \*B as “non-acceptable” based on missing tumor lesions and delineating physiological activity in left kidney.

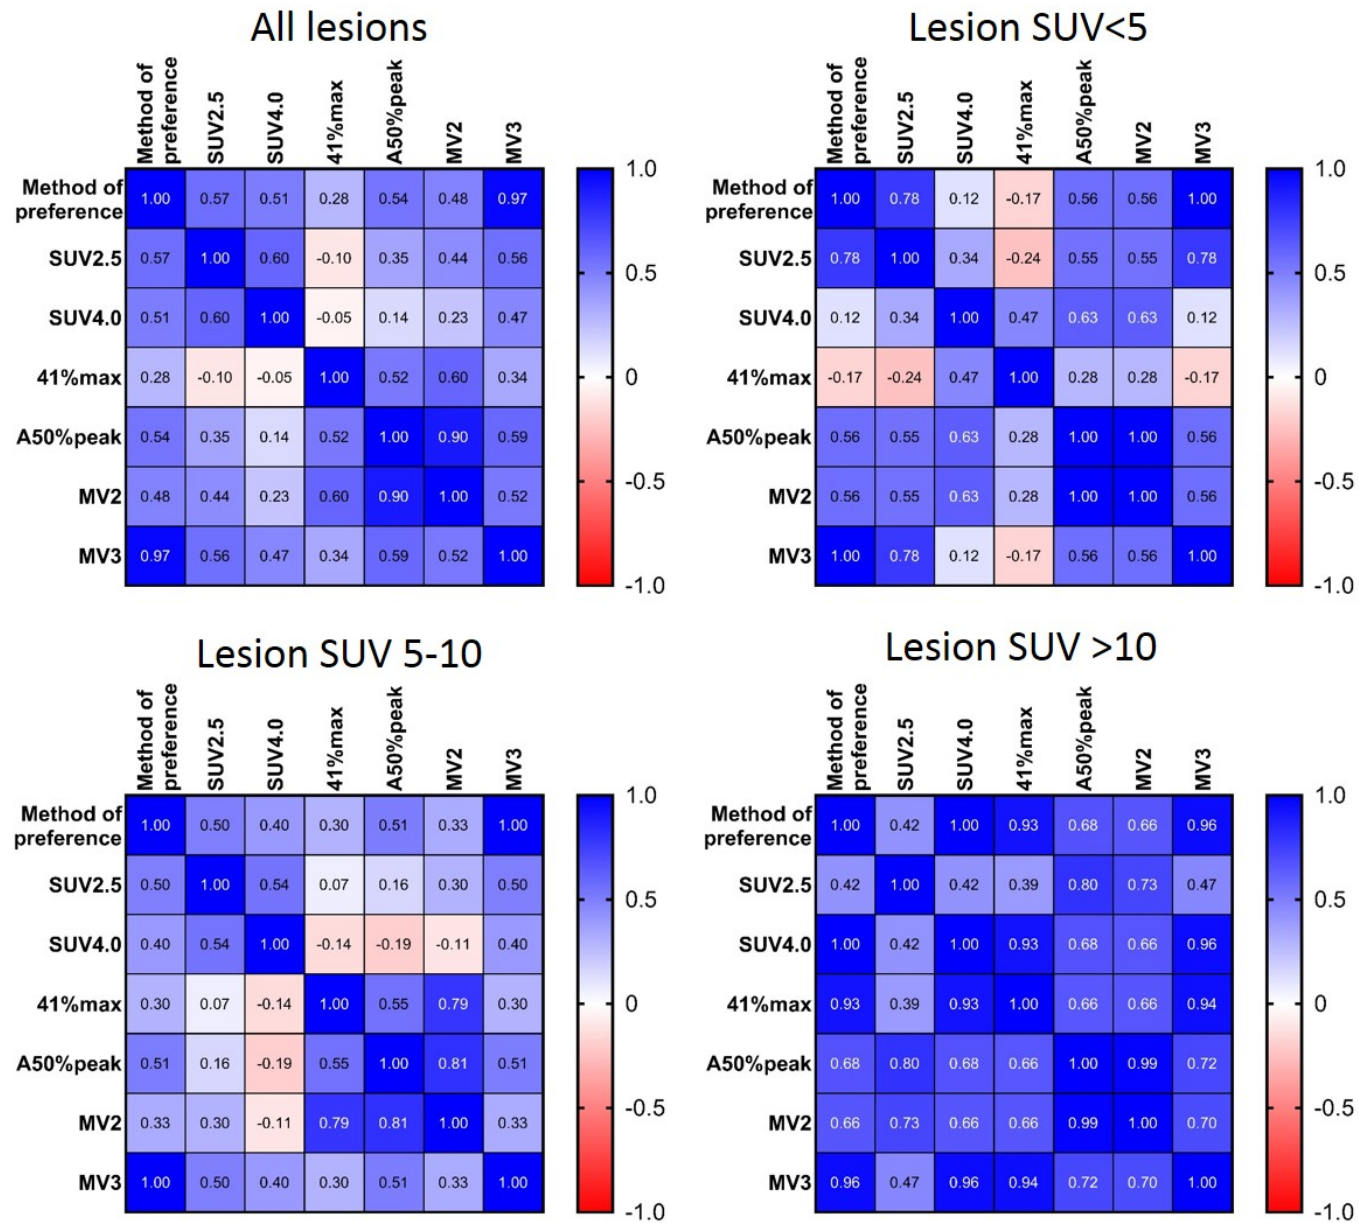

Supplemental FIGURE 3. Spearman correlation coefficients between the method derived MTVs per category of lesional SUVmax. None of the log transformed method derived volumes of lesions with a SUVmax <10 were normally distributed and/or showed high Spearman correlation coefficients. For lesions with SUVmax>10, only 50%peak and MV2 derived MTVs were not normally distributed after log transformation.

SUPPLEMENTAL TABLE 1

| <b>Acceptable score frequency per method</b>                                | SUV2.5      | SUV4.0      | 41%max      | A50%peak    | MV2         | MV3         |
|-----------------------------------------------------------------------------|-------------|-------------|-------------|-------------|-------------|-------------|
| Percentage: Total (60 lesions)                                              | 57.2        | 52.8        | 60.6        | 77.2        | 72.8        | 90.0        |
| SUVmax > 5 (45)                                                             | 48.9        | 66.7        | 67.4        | 74.1        | 68.9        | 90.4        |
| SUVmax < 5 (15)                                                             | 82.2        | 11.1        | 40.0        | 86.7        | 86.7        | 88.9        |
| SUVmax 5 - 10 (28)                                                          | 51.2        | 48.8        | 58.3        | 76.2        | 66.7        | 92.9        |
| SUVmax > 10 (17)                                                            | 45.1        | 96.1        | 82.4        | 70.6        | 72.5        | 86.3        |
| SUVmax < 10 (43)                                                            | 62.0        | 35.7        | 51.9        | 79.8        | 72.9        | 91.5        |
| SUVmax 10 - 15 (11)                                                         | 42.4        | 93.9        | 81.8        | 84.8        | 84.8        | 87.9        |
| SUVmax > 15 (6)                                                             | 50.0        | 100.0       | 83.3        | 44.4        | 50.0        | 83.3        |
| SUVmax < 15 (54)                                                            | 58.0        | 47.5        | 58.0        | 80.9        | 75.3        | 90.7        |
| <b>Good score frequency per method (of original four scoring variables)</b> | SUV2.5      | SUV4.0      | 41%max      | A50%peak    | MV2         | MV3         |
| Percentage: Total (60 lesions)                                              | 21.7        | 20.6        | 26.7        | 38.3        | 30.0        | 48.9        |
| SUVmax > 5 (45)                                                             | 13.3        | 25.9        | 31.9        | 37.8        | 26.7        | 45.9        |
| SUVmax < 5 (15)                                                             | 46.7        | 4.4         | 11.1        | 40.0        | 40.0        | 57.8        |
| SUVmax 5 - 10 (28)                                                          | 15.5        | 19.0        | 25.0        | 46.4        | 23.8        | 54.8        |
| SUVmax > 10 (17)                                                            | 9.8         | 37.3        | 43.1        | 23.5        | 31.4        | 31.4        |
| SUVmax < 10 (43)                                                            | 26.4        | 14.0        | 20.2        | 44.2        | 29.5        | 55.8        |
| SUVmax 10 - 15 (11)                                                         | 12.1        | 36.4        | 45.5        | 30.3        | 39.4        | 33.3        |
| SUVmax > 15 (6)                                                             | 5.6         | 38.9        | 38.9        | 11.1        | 16.7        | 27.8        |
| SUVmax < 15 (54)                                                            | 23.5        | 18.5        | 25.3        | 41.4        | 31.5        | 51.2        |
| <b>Specific Agreement; acceptable vs non-acceptable</b>                     | SUV2.5      | SUV4.0      | 41%max      | A50%peak    | MV2         | MV3         |
| Percentage: Total (60 lesions)                                              | 79.6        | 84.2        | 87.2        | 92.1        | 90.8        | 93.2        |
| SUVmax > 5 (45)                                                             | 75.8        | 87.8        | 89.0        | 91.0        | 88.2        | 92.6        |
| <b>SUVmax &lt; 5 (15)</b>                                                   | <b>86.5</b> | <b>20.0</b> | <b>77.8</b> | <b>94.9</b> | <b>97.4</b> | <b>95.0</b> |
| <b>SUVmax 5 - 10 (28)</b>                                                   | <b>79.1</b> | <b>78.0</b> | <b>91.8</b> | <b>93.8</b> | <b>87.5</b> | <b>94.9</b> |
| <b>SUVmax &gt; 10 (17)</b>                                                  | <b>69.6</b> | <b>95.9</b> | <b>85.7</b> | <b>86.1</b> | <b>89.2</b> | <b>88.6</b> |
| SUVmax < 10 (43)                                                            | 82.5        | 71.7        | 88.1        | 94.2        | 91.5        | 94.9        |
| SUVmax 10 - 15 (11)                                                         | 71.4        | 93.5        | 85.2        | 85.7        | 85.7        | 89.7        |
| SUVmax > 15 (6)                                                             | 66.7        | 100.0       | 86.7        | 87.5        | 100.0       | 86.7        |
| SUVmax < 15 (54)                                                            | 80.9        | 80.5        | 87.2        | 92.4        | 90.2        | 93.9        |

|                       |      |      |      |      |       |      |
|-----------------------|------|------|------|------|-------|------|
| Percentage Total (60) | 72.7 | 82.4 | 80.3 | 73.2 | 75.5  | 38.9 |
| SUVmax > 5 (45)       | 76.8 | 75.6 | 77.3 | 74.3 | 73.8  | 30.8 |
| SUVmax < 5 (15)       | 37.5 | 90.0 | 85.2 | 66.7 | 85.7  | 60.0 |
| SUVmax 5 - 10 (28)    | 78.0 | 79.1 | 88.6 | 80.0 | 75.0  | 33.3 |
| SUVmax > 10 (17)      | 75.0 | 0.0  | 33.3 | 66.7 | 71.4  | 28.6 |
| SUVmax < 10 (43)      | 71.4 | 84.3 | 87.1 | 76.9 | 77.1  | 45.5 |
| SUVmax 10 - 15 (11)   | 78.9 | 0.0  | 33.3 | 20.0 | 20.0  | 25.0 |
| SUVmax > 15 (6)       | 66.7 | 0.0  | 33.3 | 90.0 | 100.0 | 33.3 |
| SUVmax < 15 (54)      | 73.5 | 82.4 | 82.4 | 67.7 | 70.0  | 40.0 |

**Specific Agreement; good vs others**

|                               | SUV2.5 | SUV4.0 | 41%max | A50%peak | MV2  | MV3  |
|-------------------------------|--------|--------|--------|----------|------|------|
| Percentage Total (60 lesions) | 33.3   | 32.4   | 47.9   | 49.3     | 37.0 | 58.0 |
| SUVmax > 5 (45)               | 11.1   | 34.3   | 51.2   | 49.0     | 27.8 | 54.8 |
| SUVmax < 5 (15)               | 52.4   | 0.0    | 20.0   | 50.0     | 55.6 | 65.4 |
| SUV 5 - 10 (28)               | 15.4   | 37.5   | 57.1   | 59.0     | 30.0 | 65.2 |
| SUVmax > 10 (17)              | 0.0    | 31.6   | 45.5   | 16.7     | 25.0 | 25.0 |
| SUVmax < 10 (43)              | 38.2   | 33.3   | 50.0   | 56.1     | 42.1 | 65.3 |
| SUVmax 10 - 15 (11)           | 0.0    | 25.0   | 53.3   | 20.0     | 23.1 | 27.3 |
| SUVmax > 15 (6)               | 0.0    | 42.9   | 28.6   | 0.0      | 33.3 | 20.0 |
| SUVmax < 15 (54)              | 34.2   | 30.0   | 51.2   | 50.7     | 37.3 | 60.2 |
| Percentage Total (60)         | 81.6   | 82.5   | 81.1   | 68.5     | 73.0 | 59.8 |
| SUVmax > 5 (45)               | 86.3   | 77.0   | 77.2   | 69.0     | 73.7 | 61.6 |
| SUVmax < 5 (15)               | 58.3   | 95.3   | 90.0   | 66.7     | 70.4 | 52.6 |
| SUVmax 5 - 10 (28)            | 84.5   | 85.3   | 85.7   | 64.4     | 78.1 | 57.9 |
| SUVmax > 10 (17)              | 89.1   | 59.4   | 58.6   | 74.4     | 65.7 | 65.7 |
| SUVmax < 10 (43)              | 77.9   | 89.2   | 87.4   | 65.3     | 75.8 | 56.1 |
| SUVmax 10 - 15 (11)           | 86.2   | 57.1   | 61.1   | 65.2     | 50.0 | 63.6 |
| SUVmax > 15 (6)               | 94.1   | 63.6   | 54.5   | 87.5     | 86.7 | 69.2 |
| SUVmax < 15 (54)              | 79.8   | 84.1   | 83.5   | 65.3     | 71.2 | 58.2 |

Abbreviations: PA: positive agreement, NA: negative agreement
